# Supplementary material for: Intestinal macrophages arising from CCR2+ monocytes control pathogen infection by activating innate lymphoid cells
Source: PubMed Central journal article supplement (PMC4536571; doi:10.1038/ncomms9010), 2015-08-13
Supplement: NIHMS706358-supplement-1.pdf [file NIHMS706358-supplement-1.pdf]

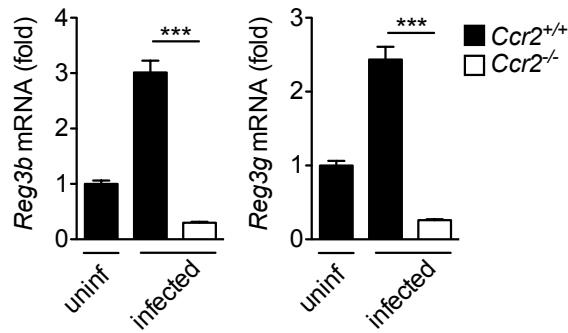

**Supplementary Figure 1. RegIII $\beta/\gamma$  induction is regulated by recruitment of CCR2<sup>+</sup> monocytes.**

Colonic epithelial cells were isolated from *C. rodentium* infected (8 dpi) and uninfected  $Ccr2^{+/+}$  and  $Ccr2^{-/-}$  mice. Expression of Reg3 $\beta$  and Reg3 $\gamma$  mRNA was analyzed by qPCR. Expression of target genes was normalized to Gapdh. Data are given as mean  $\pm$  s.d. (n=3). \*\*\*p<0.001 by Student's t test.

Small intestine

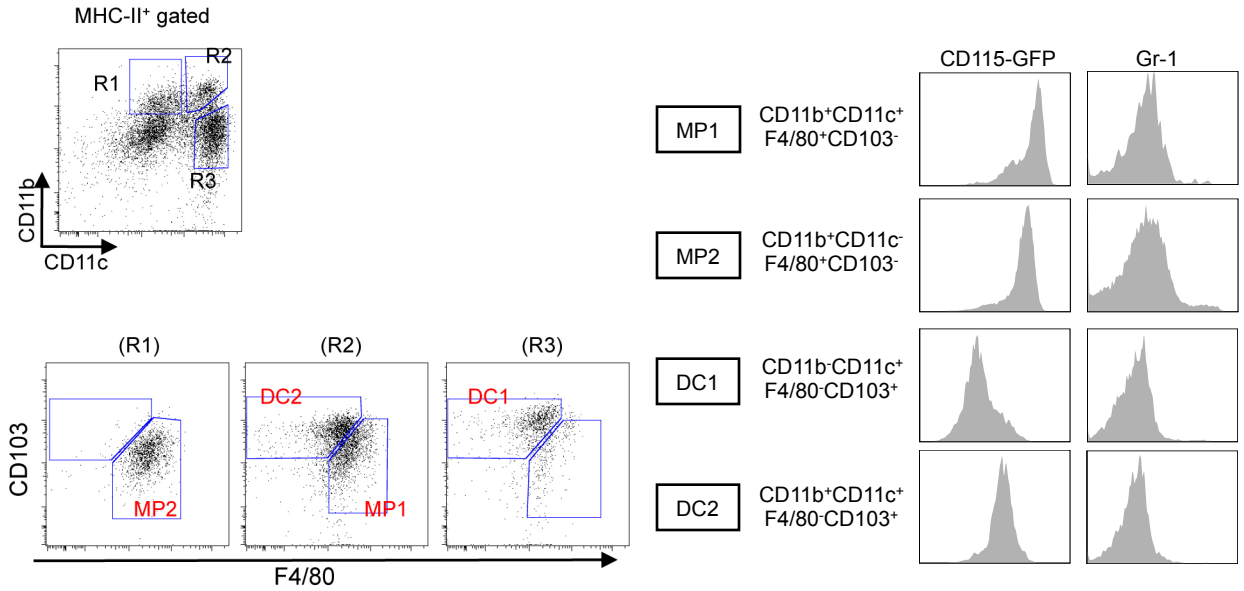

**Supplementary Figure 2. Analysis of subsets of mononuclear phagocytes in the small intestine.**

Total LP cells were isolated from the small intestine of uninfected CD115<sup>GFP</sup> reporter mice. CD45<sup>+</sup>MHC-II<sup>+</sup> mononuclear phagocytes from CD115<sup>GFP</sup> mice were further analyzed by flow cytometry.

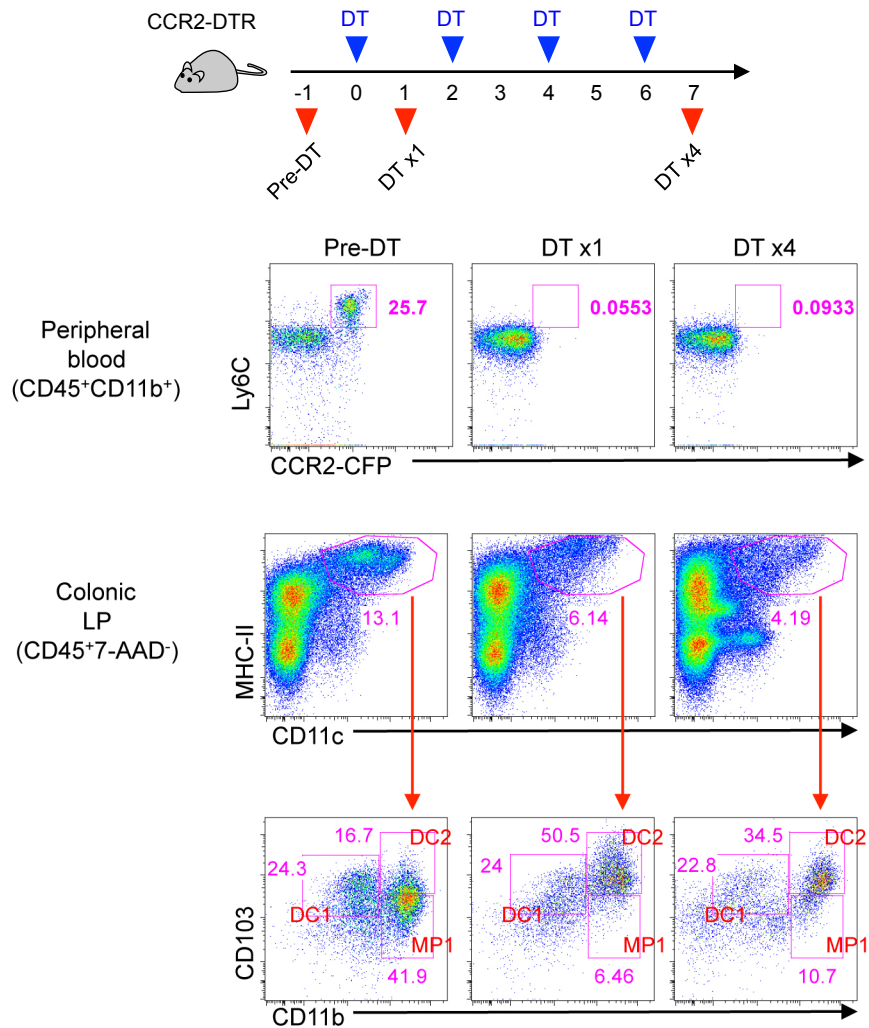

**Supplementary Figure 3. Selective depletion of MP1 subset in CCR2<sup>DTR</sup> mice after single and multiple injections of DT.**

Uninfected CCR2<sup>DTR</sup> mice were injected with diphtheria toxin (DT; 10 ng g<sup>-1</sup> body weight) 4 times in 2 day intervals. Colonic LP cells were isolated pre-injection, on day 1 post injection (single injection), and on day 7 (post 4 injections), and colonic macrophage and DC subsets were analyzed. Results are representative of at least 2 individual mice.

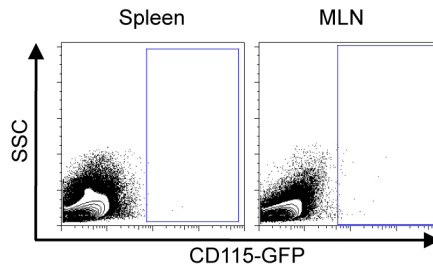

**Supplementary Figure 4. Transferred monocytes do not migrate to extra-intestinal lymphoid tissues.**

*Ccr2*<sup>-/-</sup> mice were infected with *C. rodentium*. On day 4 post-infection, CD11b<sup>+</sup>Ly6C<sup>hi</sup> bone-marrow monocytes were isolated from CD115-GFP mice and transferred into *Ccr2*<sup>-/-</sup> recipient mice as described in Figure 2d. The presence of GFP<sup>+</sup> cells in spleen and MLN (day 10 post transfer) was assessed. Results are representative of 2 independent experiments.

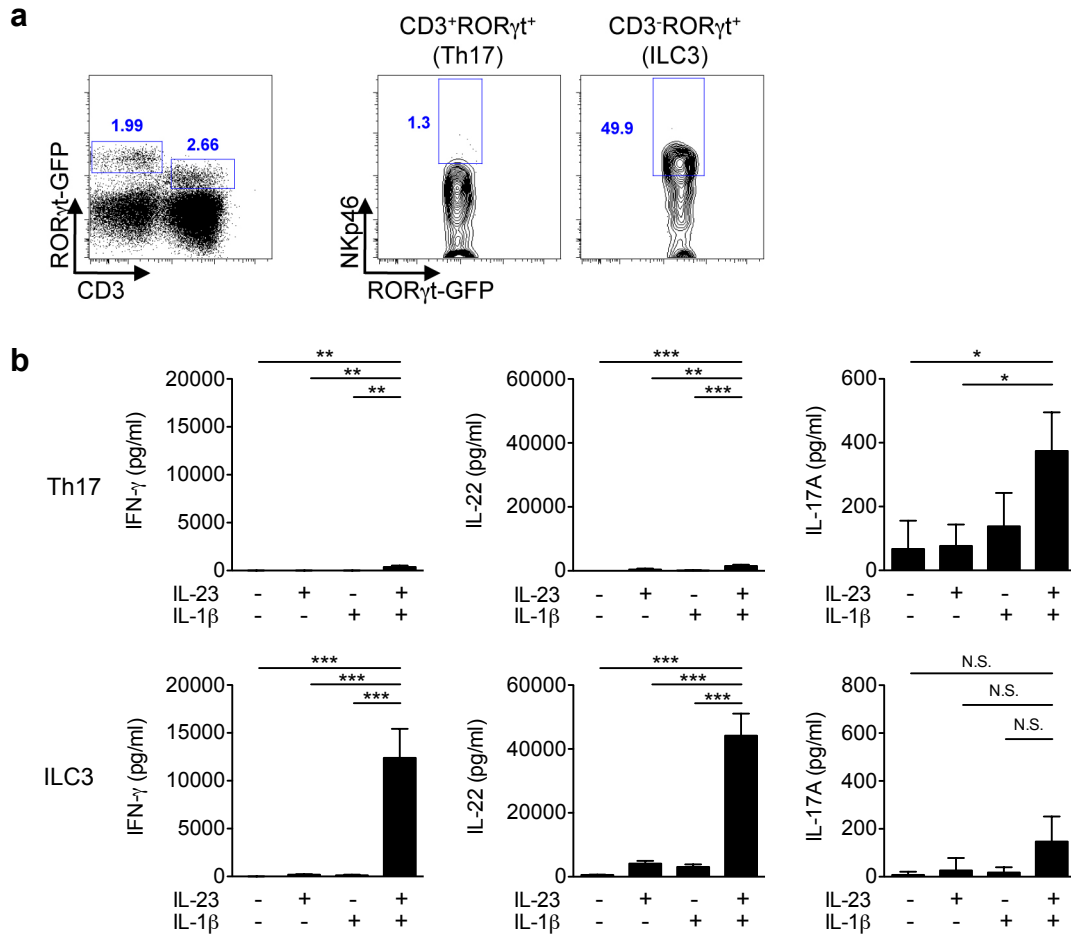

**Supplementary Figure 5. ROR $\gamma$ <sup>t</sup> ILC3s produce robust amounts of IL-22 and IFN- $\gamma$  in response to IL-23 and IL-1 $\beta$ .**

(a) LPMCs were isolated from ROR $\gamma$ <sup>t</sup><sup>GFP</sup> reporter mice and CD3<sup>+</sup>ROR $\gamma$ <sup>t</sup> (Th17) and CD3<sup>-</sup>ROR $\gamma$ <sup>t</sup> (ILC3) cells were further stained for NKp46. (b) Purified intestinal CD3<sup>+</sup>CD4<sup>+</sup>ROR $\gamma$ <sup>t</sup> Th17 cells and CD3<sup>-</sup>ROR $\gamma$ <sup>t</sup> ILCs ( $1 \times 10^6$  cells ml<sup>-1</sup>) were stimulated with recombinant IL-23 (20 ng ml<sup>-1</sup>), IL-1 $\beta$  (20 ng ml<sup>-1</sup>), or IL-23 plus IL-1 $\beta$  for 24 hrs. Cytokines in culture supernatants were analyzed by ELISA. Data are given as mean  $\pm$  s.d. (n=4). \*p<0.05; \*\*p<0.01; \*\*\*p<0.001; N.S., not significant by Bonferroni test.

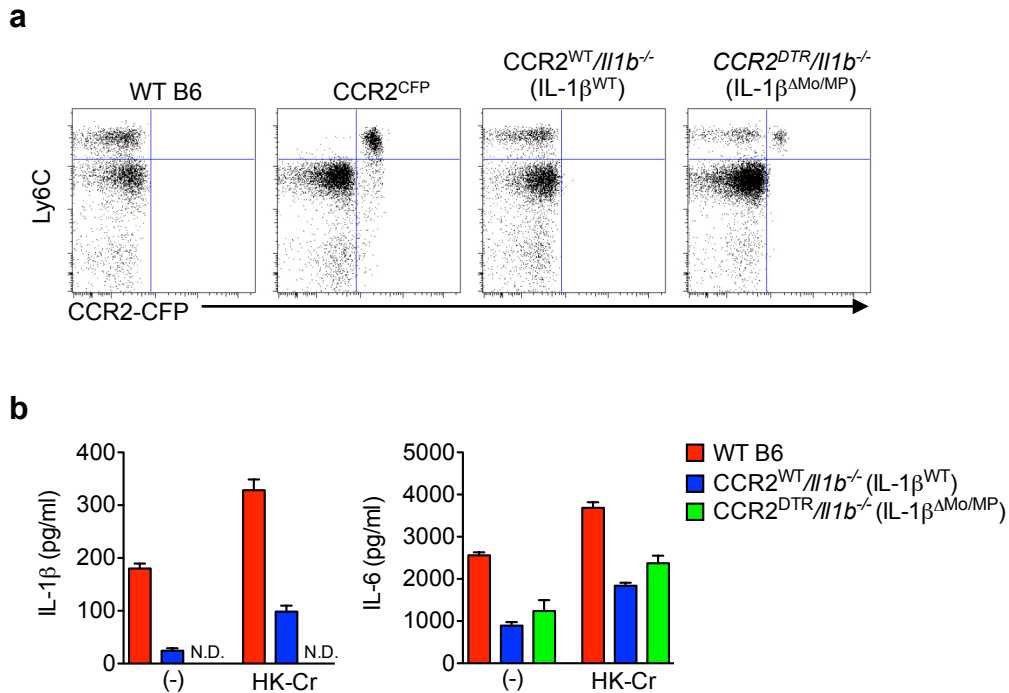

**Supplementary Figure 6. CCR2<sup>WT</sup>/I11β<sup>-/-</sup> mixed chimeric mice produce detectable but impaired level of IL-1β compared to non-chimeric control mice.**

(a) Peripheral blood were isolated from WT, CCR2<sup>WT</sup>/I11β<sup>-/-</sup> (IL-1β<sup>WT</sup>) and CCR2<sup>DTR</sup>/I11β<sup>-/-</sup> (IL-1β<sup>ΔMo/MP</sup>) chimeric mice. Expression of CCR2-CFP was analyzed on CD45<sup>+</sup>CD11b<sup>+</sup>Ly6C<sup>hi</sup> monocytes. (b) WT, Ccr2<sup>WT</sup>/I11β<sup>-/-</sup> (IL-1β<sup>WT</sup>) and Ccr2<sup>DTR</sup>/I11β<sup>-/-</sup> (IL-1β<sup>ΔMo/MP</sup>) mice were infected with *C. rodentium*, and CCR2<sup>+</sup> monocytes and monocyte-derived MP1 cells were depleted by DT injection (10 ng/g body weight) on days 5 and 7 post-infection. On day 8 post infection, colonic LPMCs were isolated. 2 x 10<sup>6</sup> cells ml<sup>-1</sup> LPMCs were cultured in the presence or absence of heat-killed *C. rodentium* (MOI=10) for 24 hrs. Cytokines in culture supernatants were analyzed by ELISA. Data are given as mean ± s.d. (n=3).

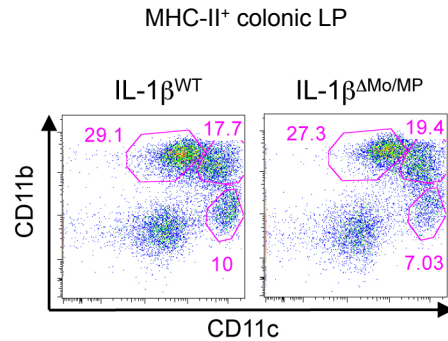

**Supplementary Figure 7. Analysis of CCR2<sup>DTR</sup>//11b<sup>-/-</sup> mixed chimeric mice colonic macrophages.**

CCR2<sup>WT</sup>//11b<sup>-/-</sup> (IL-1 $\beta$ <sup>WT</sup>) or CCR2<sup>DTR</sup>//11b<sup>-/-</sup> (IL-1 $\beta$  <sup>$\Delta$ Mo/MP</sup>) mice were infected with *C. rodentium*, and CCR2<sup>+</sup> monocytes and monocyte-derived MP1 cells were depleted by DT injection (10 ng g<sup>-1</sup> body weight) on days 5 and 7 post-infection. On day 8 post infection, colonic LPMCs were isolated, and colonic macrophage and DC subsets were analyzed. The percentage of colonic macrophages and DCs were comparable between IL-1 $\beta$ <sup>WT</sup> and IL-1 $\beta$  <sup>$\Delta$ Mo/MP</sup> mice.

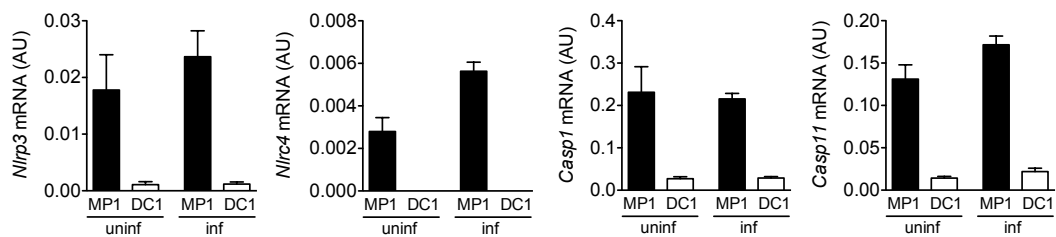

**Supplementary Figure 8. Inflammasome activation in MP1 cells.**

MP1 and DC1 subsets were isolated from uninfected and *C. rodentium*-infected CD115-GFP animals. Cytokine mRNA expression was analyzed by qPCR. Data are given as mean  $\pm$  s.d. (n=5-7).



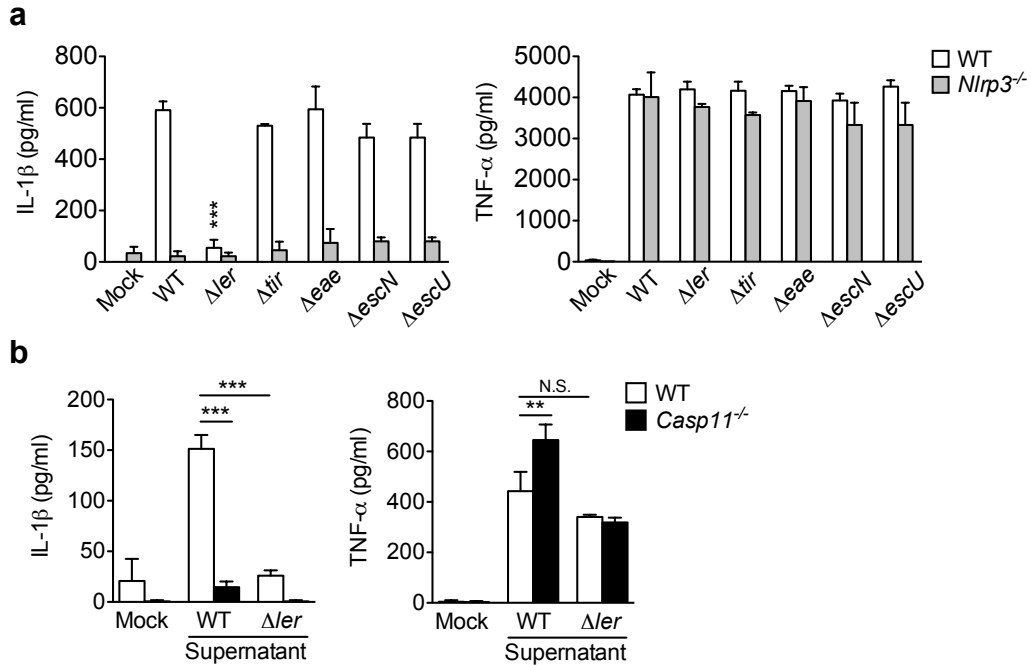

**Supplementary Figure 9. *Ler*-dependent virulence factors in *C. rodentium* is required for caspase-11-mediated IL-1 $\beta$  induction.**

(a) BMDMs from WT and *Nlrp3*<sup>-/-</sup> mice were stimulated with WT *C. rodentium* or isogenic mutants (MOI=25) 1 hr without antibiotics and then cultured additional 17 hrs in the presence of 100  $\mu\text{g ml}^{-1}$  gentamicin. Cytokines in the culture supernatant were analyzed by ELISA. Data are given as mean  $\pm$  s.d. (n=3). Results are representative of 3 independent experiments. \*\*\* p<0.001 by Dunnett's test (compared to WT). (b) WT and  $\Delta\text{ler}$  mutant *C. rodentium* were cultured in DMEM in cell culture incubator for 16 hrs. Bacterial culture supernatants were harvested and live bacteria were removed by passing 0.45  $\mu\text{m}$  syringe filter. One third volume of sterile bacterial culture sups were added in BMDMs from WT and *Casp11*<sup>-/-</sup> mice, and incubated for 18 hrs. Cytokines in the culture supernatant were analyzed by ELISA. mean  $\pm$  s.d. (n=3). Results are representative of 3 independent experiments. \*\*p<0.01; \*\*\*p<0.001; N.S., not significant by Bonfferoni test.

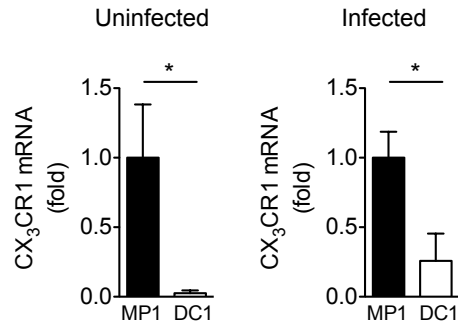

**Supplementary Figure 10. CX<sub>3</sub>CR1 expression in MP1 and CD103<sup>+</sup> DC subsets.**

MP1 and DC1 subsets were isolated from uninfected and *C. rodentium*-infected CD115<sup>gfp</sup> animals. Expression of CX<sub>3</sub>CR1 was analyzed by qPCR. Data are given as mean ± s.d. (n=5-7). \*p<0.05; by Mann-Whitney *U* test.

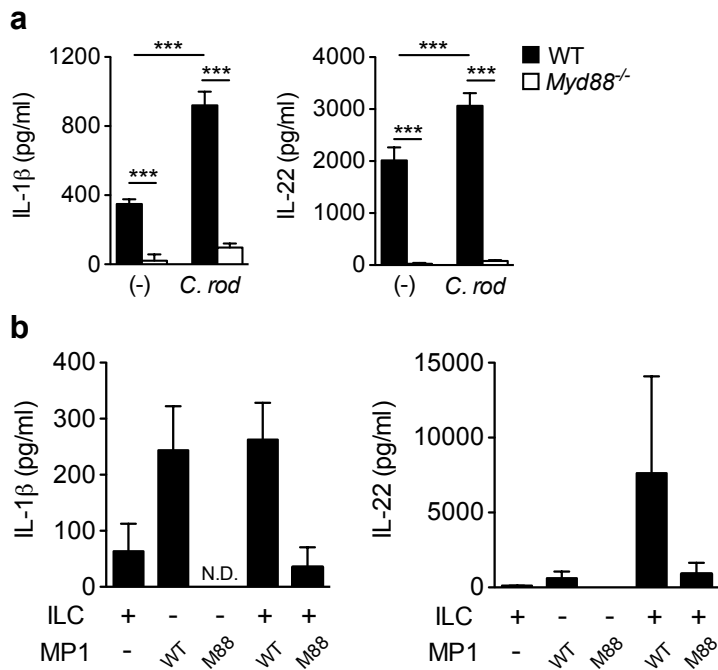

**Supplementary Figure 11. MyD88 signaling is required for IL-1 $\beta$  production and ILC activation by MP1.**

(a) WT and *Myd88*<sup>-/-</sup> mice were infected with *C. rodentium*. On day 8 post infection, colonic LPMCs were isolated.  $2 \times 10^6$  cells ml<sup>-1</sup> LPMCs were cultured in the presence or absence of heat-killed *C. rodentium* (MOI=10) for 24 hrs. Cytokines in culture supernatants were analyzed by ELISA. Data are given as mean  $\pm$  s.d. (n=3). Results are representative of 3 independent experiments. \*\*\* p<0.001 by Dunn's test. (b) CD3<sup>-</sup>ROR $\gamma$ t<sup>+</sup> ILCs from uninfected ROR $\gamma$ t<sup>GFP/+</sup> reporter mice and MP1 cells from *C. rodentium*-infected (day 8) WT and *Myd88*<sup>-/-</sup> mice were isolated. ILCs and MP1 cells ( $1 \times 10^6$  cells ml<sup>-1</sup>) were cultured alone or co-cultured with heat-killed *C. rodentium* (MOI=10) for 24 hrs. Data are given as mean  $\pm$  s.d. of 3 independent experiment.

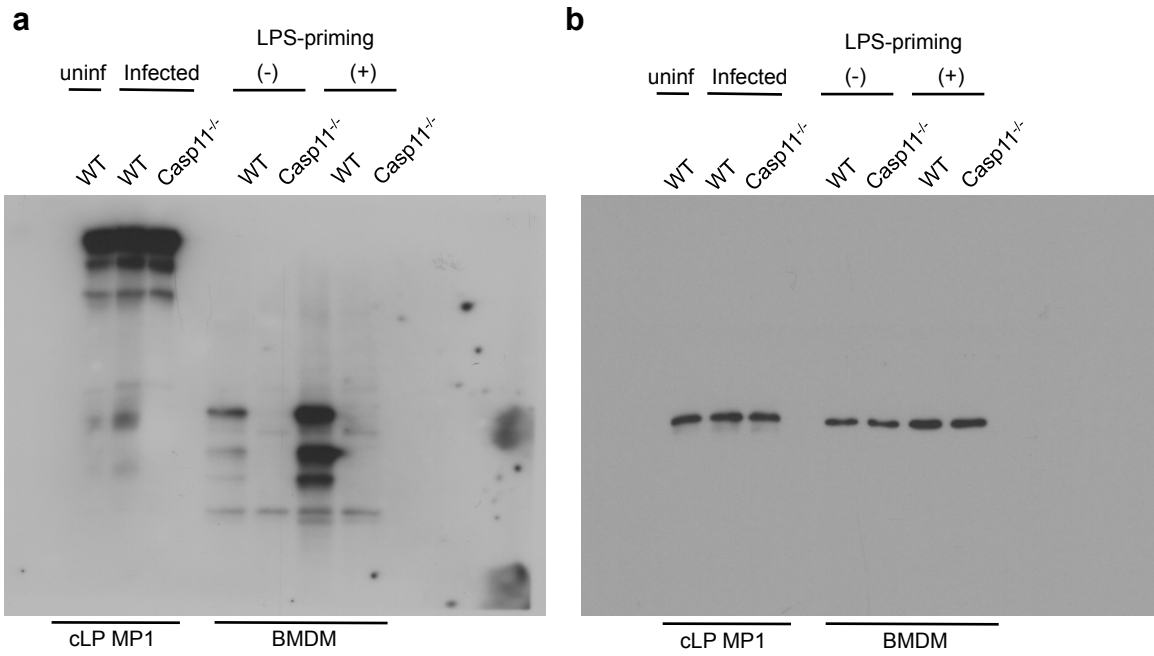

**Supplementary Figure 12. The original images for the main figures.**

(a) Fig. 5e; Caspase-11. (b) Fig. 5e;  $\beta$ -actin

**Supplementary Table 1. Primer sequences used in this study.**

| <b>Genes</b>        | <b>Forward</b>                    | <b>Reverse</b>                  |
|---------------------|-----------------------------------|---------------------------------|
| IL-1 $\beta$        | 5'-CAACCAACAAGTGATATTCTCCATG-3'   | 5'-GATCCACACTCTCCAGCTGCA-3'     |
| IL-23p19            | 5'-TCCCTACTAGGACTCAGCCAAC-3'      | 5'-GCTGCCACTGCTGACTAGAA-3'      |
| IL-12p35            | 5'-CCAGGTGTCTTAGCCAGTCC-3'        | 5'-GCAGTGCAGGAATAATGTTTCA-3'    |
| IL-12/23p40         | 5'-CCTGAAGTGTGAAGCACCAAATTAC-3'   | 5'-GAACTTCAAGTCCATGTTTCTTTGC-3' |
| IL-6                | 5'-GAGGATACCACTCCCAACAGACC-3'     | 5'-AAGTGCATCATCGTTGTTTCATACA-3' |
| TNF                 | 5'-GCCTCCCTCTCATCAGTTCT-3'        | 5'-CACTTGGTGGTTTGCTACGA-3'      |
| IL-10               | 5'-CCCTTTGCTATGGTGTCTT-3'         | 5'-TGGTTTCTCTTCCCAAGACC-3'      |
| TGF- $\beta$ 1      | 5'-TGACGTCACCTGGAGTTGTACGG-3'     | 5'-GGTTCATGTCATGGATGGTGC-3'     |
| IL-22               | 5'-TTTCCTGACCAAACCTCAGCA-3'       | 5'-TCTGGATGTTCTGGTCGTCA-3'      |
| NLRP3               | 5'-ATGGTATGCCAGGAGGACAG-3'        | 5'-ATGCTCCTTGACCAGTTGGA-3'      |
| NLRC4               | 5'-AGAAGGGCTCAGCGGCCTGCAA-3'      | 5'-TTCACCCAGGGGGTAGAAGTTCA-3'   |
| Caspase-1           | 5'-GCCCACTGCTGATAGGGTGA-3'        | 5'-CCCGGAAGAGGTAGAAACG-3'       |
| Caspase-11          | 5'-TGTCATCTCTTTGATATATTCCTGAAG-3' | 5'-CAAGGTTGCCCGATCAAT-3'        |
| RegIII $\beta$      | 5'-CTCTCCTGCCTGATGCTCTT-3'        | 5'-GTAGGAGCCATAAGCCTGGG-3'      |
| RegIII $\gamma$     | 5'-TCAGGTGCAAGGTGAAGTTG-3'        | 5'-GGCCACTGTTACCACTGCTT-3',     |
| CX <sub>3</sub> CR1 | 5'-AAGTTCCTTCCCATCTGCT-3'         | 5'-CAAAATTCTCTAGATCCAGTTCAGG-3' |
| $\beta$ -actin      | 5'-AAGTGTGACGTTGACATCCG-3'        | 5'-GATCCACATCTGCTGGAAGG-3'      |
